# Supplementary material
Source: HighWire-hosted journal article supplement (https://www.annfammed.org/highwire/filestream/13690/field_highwire_adjunct_files/0/Reget_Supp_App.pdf)
Supplement: Reget_Supp_App.pdf [file Reget_Supp_App.pdf]

## **Supplemental materials for**

Reget K, Ali S, Pratt R, Harper PG. The impact of COVID-19 proactive outreach with Somali seniors. *Ann Fam Med*. 2021;19(2):179-179.

## **AFFILIATIONS:**

University of Minnesota, Program in Health Disparities Research and MHealth Fairview

## **REFERENCES:**

Godoy, M., & Wood, D. (2020, May 30). What Do Coronavirus Racial Disparities Look Like State By State? Retrieved July 23, 2020

Heger Boyle, E., & Ali, A. (2010). Culture, Structure, and the Refugee Experience in Somali Immigrant Family Transformation. *International Migration*, 48(1), 47–79.

Mayo Clinic Staff. (2020, July 3). *COVID-19: Who's at higher risk of serious symptoms?* <https://www.mayoclinic.org/diseases-conditions/coronavirus/in-depth/coronavirus-who-is-at-risk/art-20483301>.

## **ACKNOWLEDGEMENT:**

Minnesota Medical Reserve Corps volunteers who contacted the patients. The Department of Health Disparities and Cancer Research Summer Internship who funded the intern to review the data and responses before the program. Smiley's Family Medicine Clinic resident and faculty doctors who allowed for their patient panels to be reviewed and enrolled in the program. University of Minnesota Medical School Department of Family Medicine and Community Health and University of Minnesota Program in Health Disparities Research for collaboration and connection to community partnerships.

## TABLES:

Table 1

*Content of calls as reported by Somali speaking phone provider*

| Content Discussed in Phone Call                           | Number of Phone Calls | Example                                                                                                        |
|-----------------------------------------------------------|-----------------------|----------------------------------------------------------------------------------------------------------------|
| Expressing no COVID-18 symptoms                           | 43                    | <i>"Patient stated that they has none of COVID-19 symptoms"</i>                                                |
| Providing information that the Clinic is open             | 23                    | <i>"Patient didn't know the clinic was open and were informed of its opening"</i>                              |
| No discussion                                             | 21                    | No example provided                                                                                            |
| Awareness of COVID-19                                     | 15                    | <i>"A family member was exposed to it, had been tested" or "has heard of COVID-19 from family and friends"</i> |
| Spoke to a family member                                  | 15                    | <i>"Family member answered the phone"</i>                                                                      |
| Requested a prescription refill/Spoke about prescriptions | 17                    | <i>"patient needed refills on their medication"</i>                                                            |
| Had a COVID-19 test                                       | 4                     | <i>"Patient had a COVID-19 test"</i>                                                                           |
| Further translation needed                                | 3                     | <i>"Communication with patient was difficult, need further translation"</i>                                    |
| No longer patient at clinic                               | 3                     | <i>"Patient moved out of state"</i>                                                                            |

Table 2  
*Response to Outreach Program*

| Response options | n  | Feedback                                                                                                                                                                                                                                         |
|------------------|----|--------------------------------------------------------------------------------------------------------------------------------------------------------------------------------------------------------------------------------------------------|
| Yes              | 59 | <i>"I learned some things about COVID-19 symptoms and preventions that I haven't heard from people or watched on Somali TV before."</i><br><i>"Receiving a call from Smiley's made me feel that they care enough to check on their patient."</i> |
| No               | 22 | <i>"Too much of a time commitment"</i><br><i>"Family members already keeping them informed"</i>                                                                                                                                                  |
| Unsure           | 30 | <i>"maybe benefit, but already receiving lots of education about COVID-19"</i>                                                                                                                                                                   |

*Note:* Responses were taken in Somali language and translated to English by Somali speaking provider
